# Supplementary material
Source: Springer Nature journal article supplement (https://www.springermedizin.de/resource/supplementary/12889_2013_6730_MOESM1_ESM.pdf/9498666)

**Background variables****Mediating variables****Dependent variables**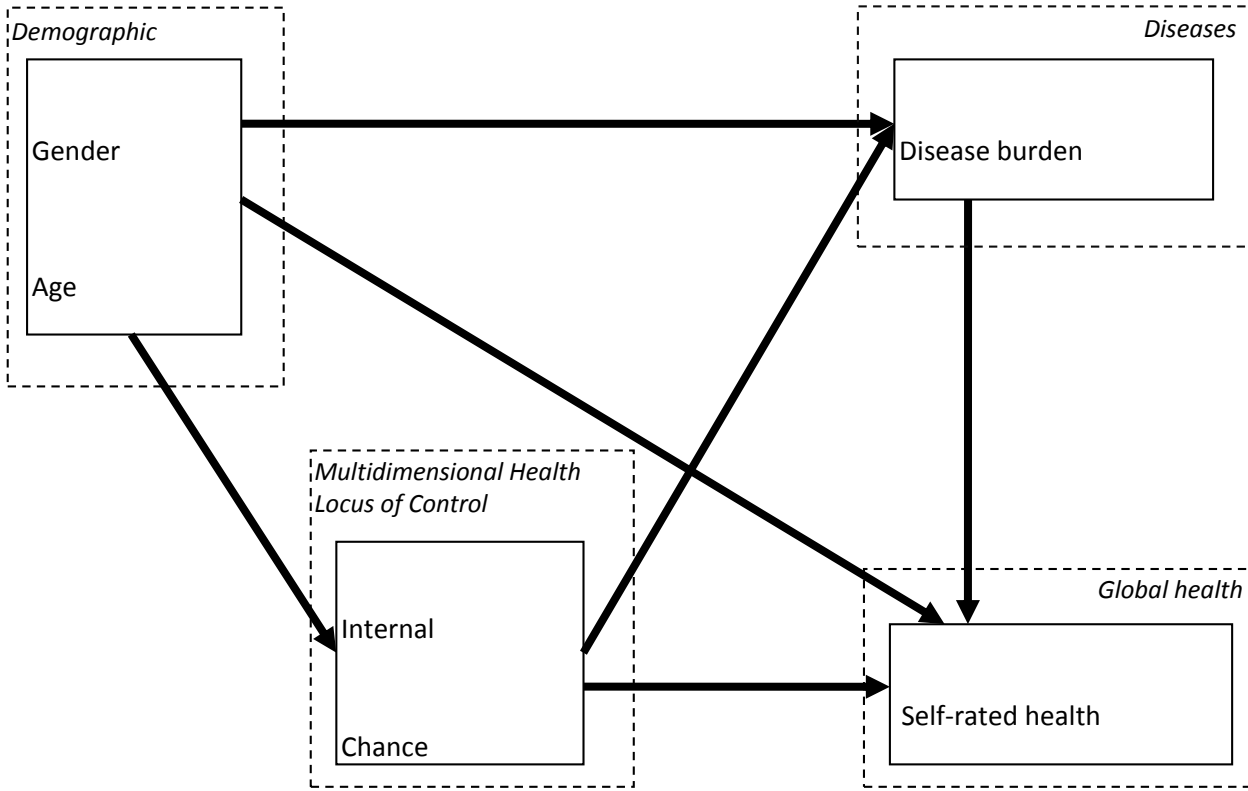

Supplement: MOESM1 [file 9498666]
